# Supplementary material
Source: publisher site journal article supplement (http://www.dovepress.com/get_supplementary_file.php?f=256544.docx)
Supplement: Supplementary file 1 [file get_supplementary_file.php]

**Supplementary Data**

**Supplementary Table 1. Antimicrobial resistance phenotypes (Minimum inhibitory concentrations, MICs) and genotypes of strain 2019036D.**

| Isolate | 2019036D | | | | | | | | | | | | |
| --- | --- | --- | --- | --- | --- | --- | --- | --- | --- | --- | --- | --- | --- |
| Resistance genes | *mcr*-8.2 | *bla*CTX-M-27, *bla*CTX-M-55, *bla*DHA-1 | | | | *tet*(D) | *qnrB4* | *mph*(A) | *sul1, dfrA12* | *mph*(A) | *qnrB4* | *floR*, *cmlA1* | none |
| Antibioticsa | CL | CFZ | CFX | CTX | CAZ | TET | NAL | ERY | SXT | AZM | CIP | CHL | IPM |
| MICs(μg/ml) | 4 | 16 | >64 | 8 | 32 | 32 | >64 | 16 | 8 | >64 | 32 | >64 | 0.5 |

a CL colistin, CFZ cefazolin, CFX cefoxitin, CTX cefotaxime, CAZ ceftazidime, TET tetracycline, NAL nalidixicacid, ERY erythromycin, SXT trimethoprim/sulfamethoxazole, AZM azithromycin, CIP ciprofloxacin, CHL chloramphenicol, IPM imipenem.


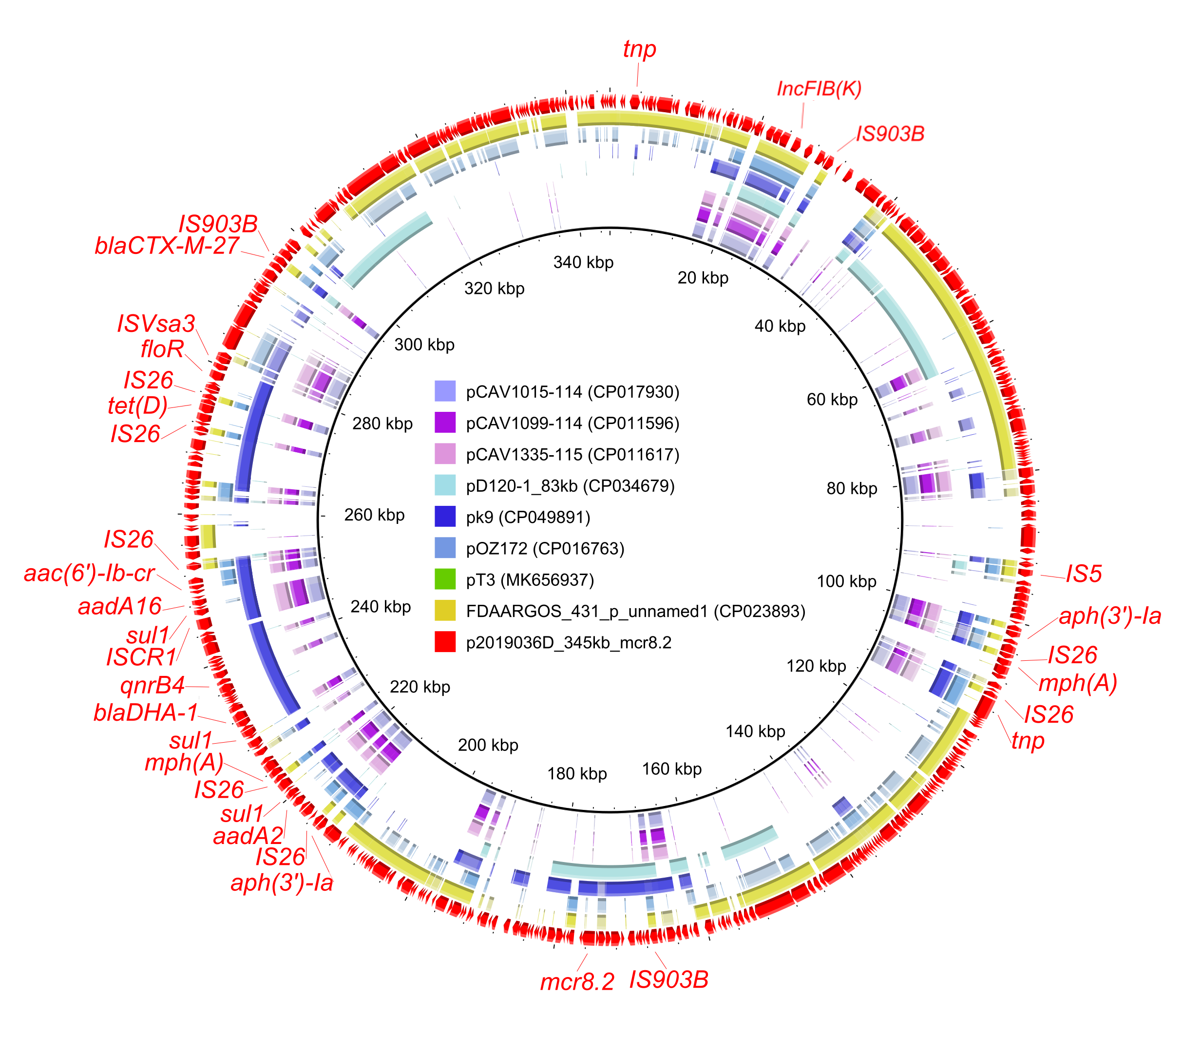
**Supplementary Figure 1. Comparative analysis of p2019036D-mcr8-345kb (this study) with other *mcr*-bearing IncFIB(K) plasmids in NCBI databases.**
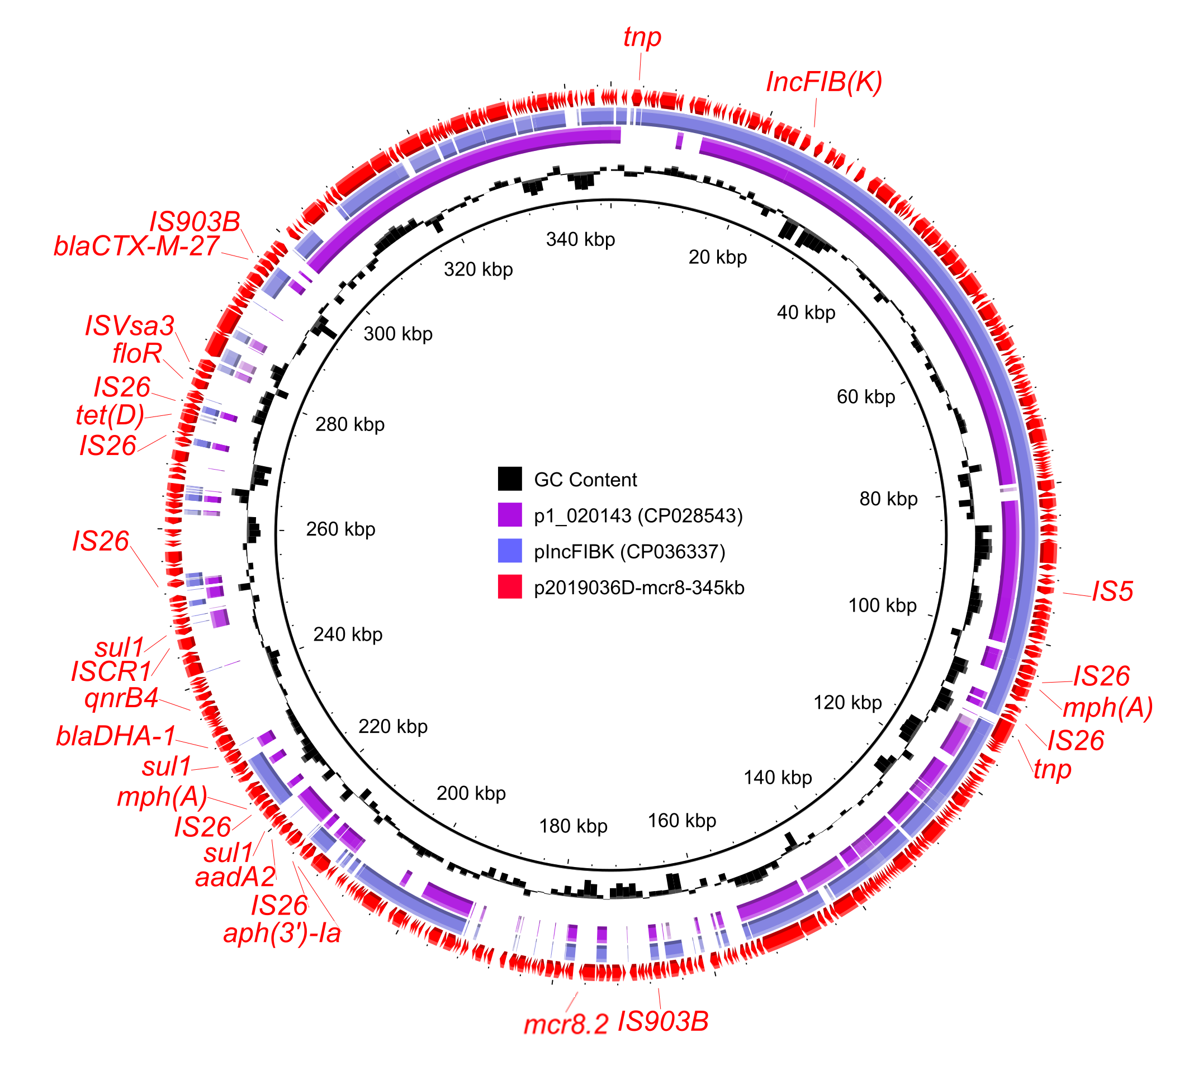


**Supplementary Figure 2. Comparative analysis of p2019036D-mcr8-345kb (this study) with most similar plasmids pIncFIBK and p1_020143.**


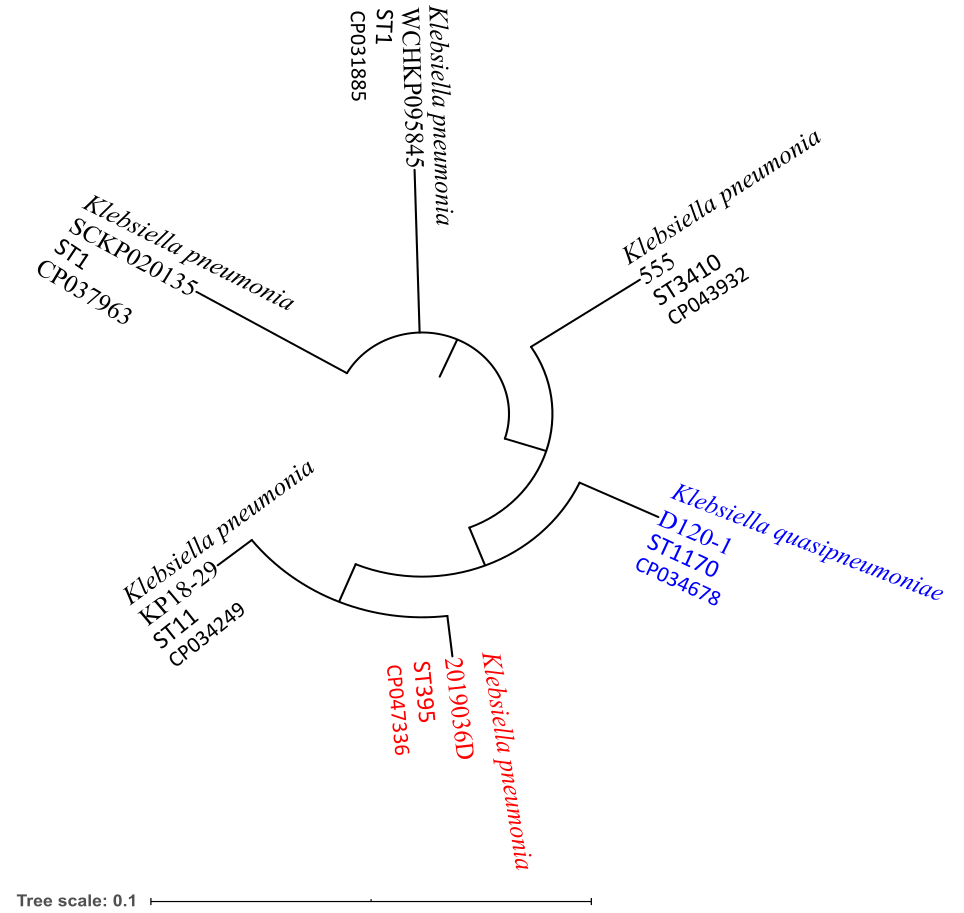


**Supplementary Figure 3. Phylogenetic tree of six *mcr-8.2*-positive strains and their basic information.**

**
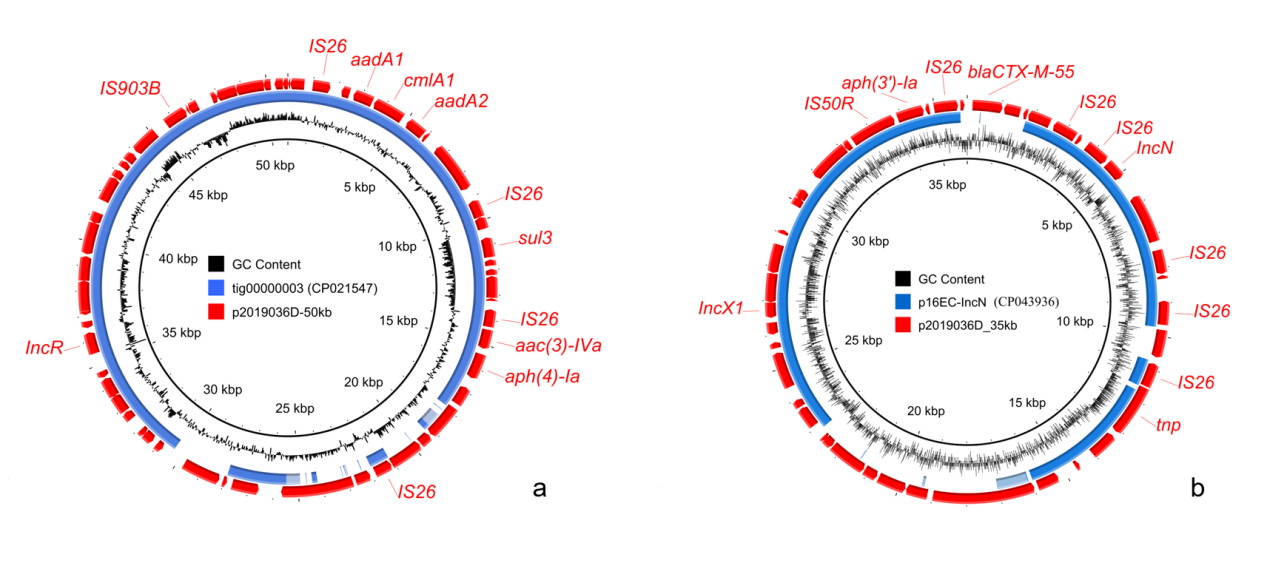
Supplementary Figure 4. Circular plasmids comparison of p2019036D-50kb (a) and p2019036D-35kb (b) with most similar plasmids in NCBI databases.**
